# Supplementary material for: Targeted hollow pollen silica nanoparticles for enhanced intravesical therapy of bladder cancer
Source: Royal Society of Chemistry journal article supplement (doi:10.1039/d3bm00631j), 2023-01-01
Supplement: d3bm00631j1.pdf [file d3bm00631j1.pdf]

## Supporting Information

# Targeted Hollow Pollen Silica Nanoparticles for Enhanced Intravesical Therapy of Bladder Cancer

Lulu Wang<sup>a,b</sup>, Fan Qi<sup>a,c</sup>, Luopeng Bi<sup>c</sup>, Jiao Yan<sup>a</sup>, Xiaoqing Han<sup>a</sup>, Yanjing Wang<sup>a,b</sup>,  
Panpan Song<sup>a,b</sup>, Yanbo Wang<sup>c\*</sup>, Haiyuan Zhang<sup>a,b\*</sup>

<sup>a</sup> Laboratory of Chemical Biology, Changchun Institute of Applied Chemistry,  
Chinese Academy of Sciences, Changchun, 130022, Jilin, China

<sup>b</sup> School of Applied Chemistry and Engineering, University of Science and  
Technology of China, Hefei, 230026, Anhui, China

<sup>c</sup> Department of Urology, The First Hospital of Jilin University, Changchun, 130022,  
Jilin, China

\*Corresponding author:

**Haiyuan Zhang** - Laboratory of Chemical Biology, Changchun Institute of Applied  
Chemistry, Chinese Academy of Sciences, Changchun 130022, China; School of  
Applied Chemistry and Engineering, University of Science and Technology of China,  
Hefei, 230026, Anhui, China; E-mail: zhangh@ciac.ac.cn

**Yanbo Wang** - Department of Urology, The First Hospital of Jilin University,  
Changchun, 130022, Jilin, China; E-mail: wangyanb@jlu.edu.cn

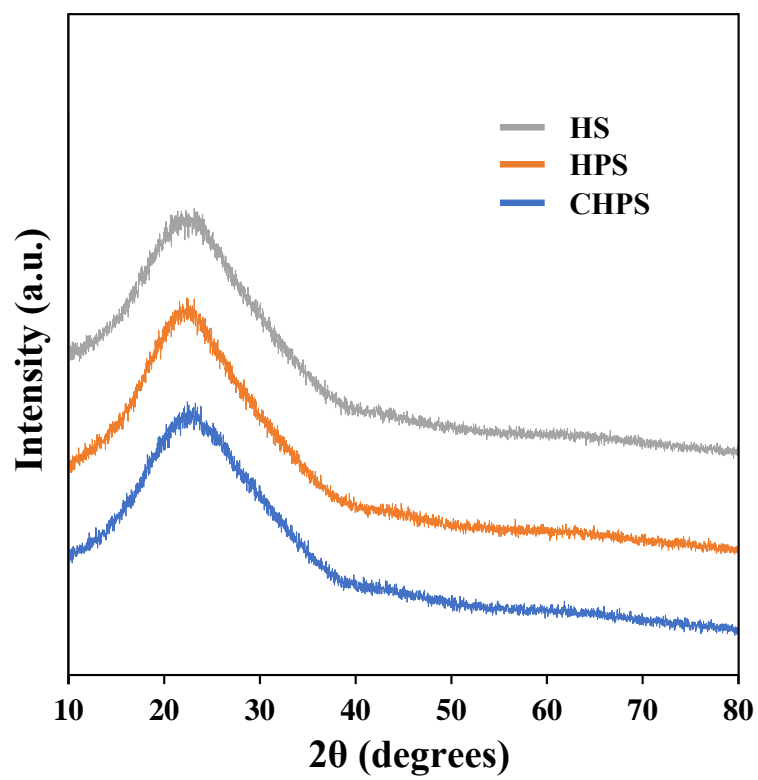

**Fig. S1** XRD spectra of CHPS, HPS and HS NPs.

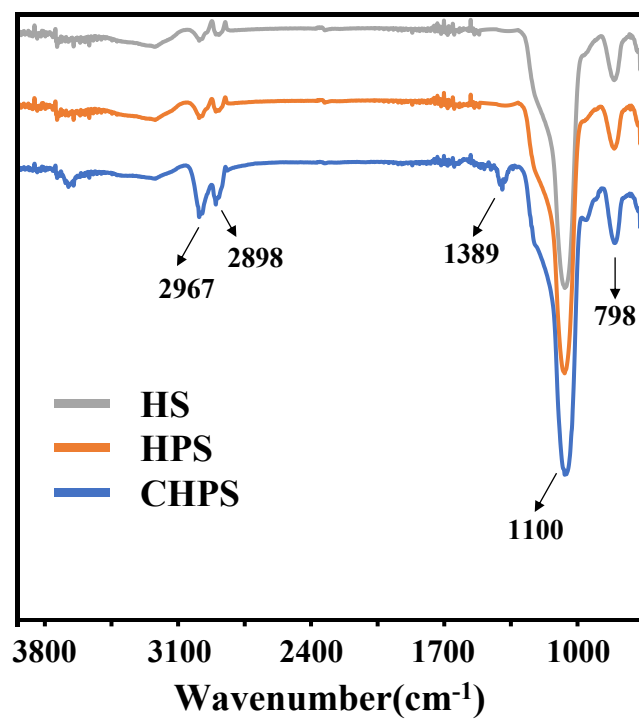

**Fig. S2** FTIR spectra of CHPS, HPS and HS NPs.

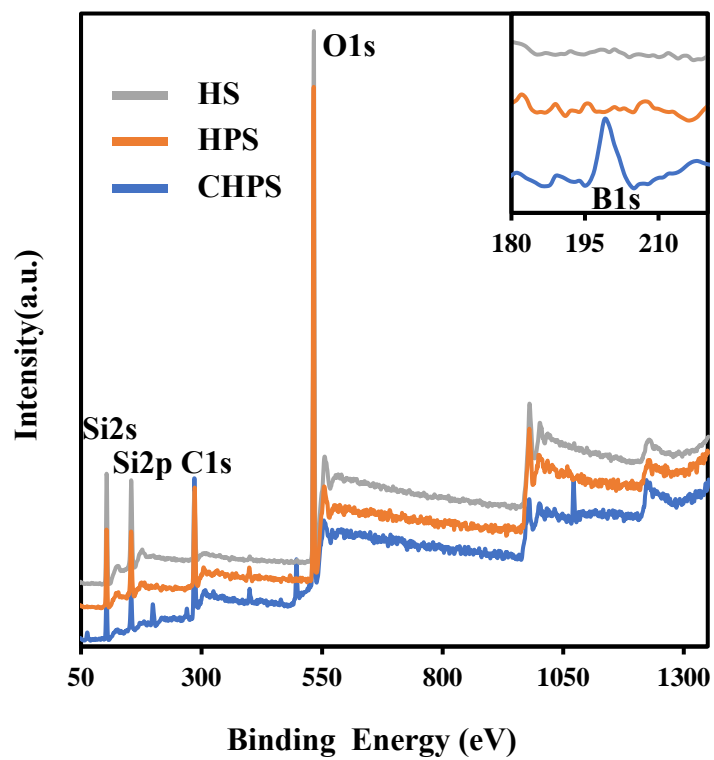

**Fig. S3** XPS diagram of CHPS, HPS and HS NPs.

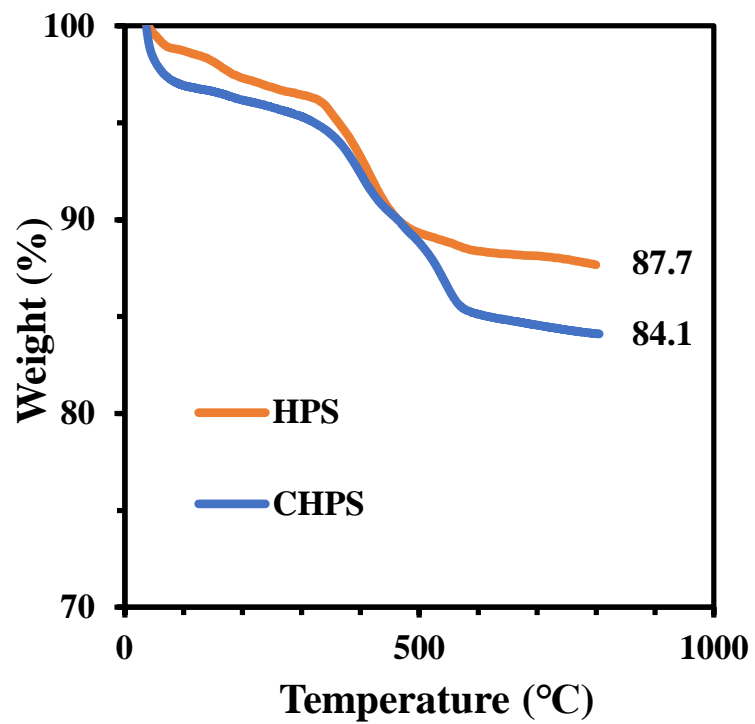

Fig. S4 Thermogravimetric analysis of CHPS and HPS NPs.

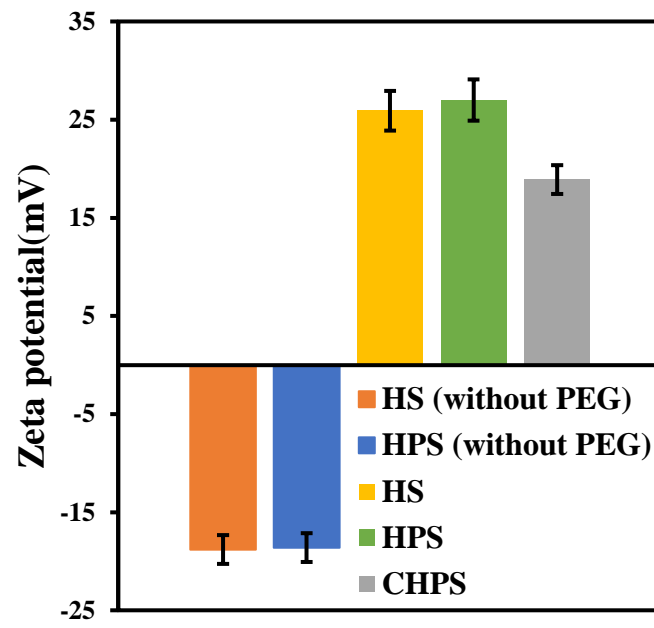

**Fig. S5** Zeta potentials of HPS (without PEG), HS (without PEG), HPS, HS and CHPS NPs.

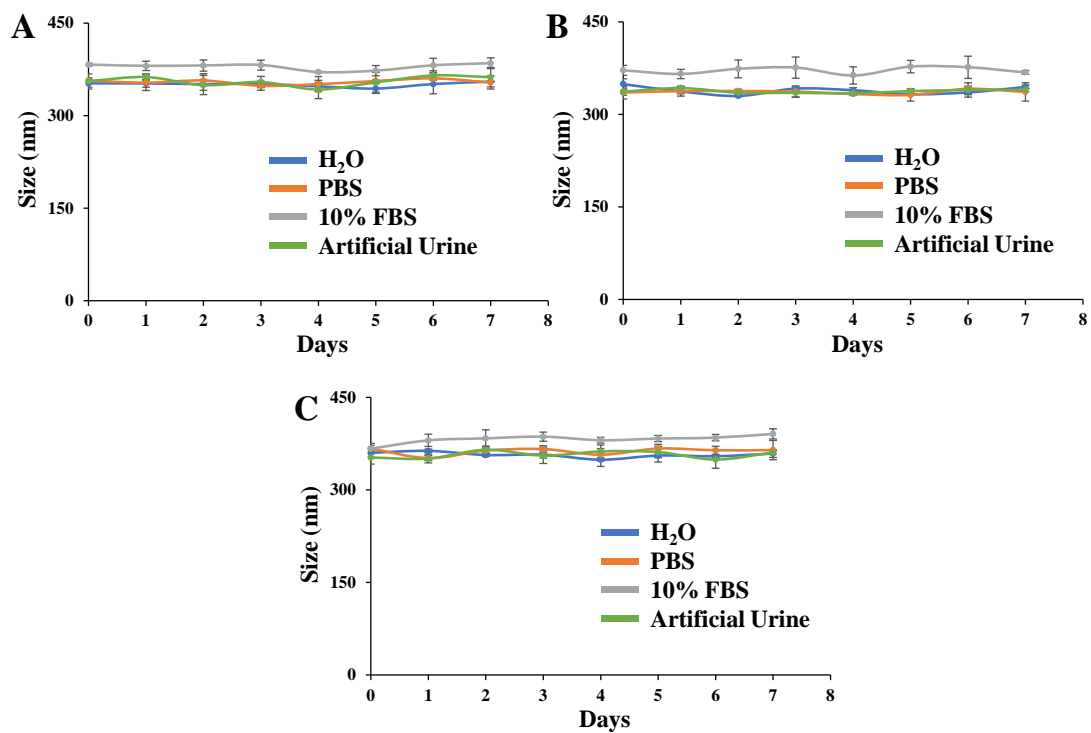

**Fig. S6** Hydrodynamic sizes of CHPS (A), HPS (B) and HS (C) NPs in water, PBS, 10% FBS and artificial urine solution at 37 °C within 7 days.

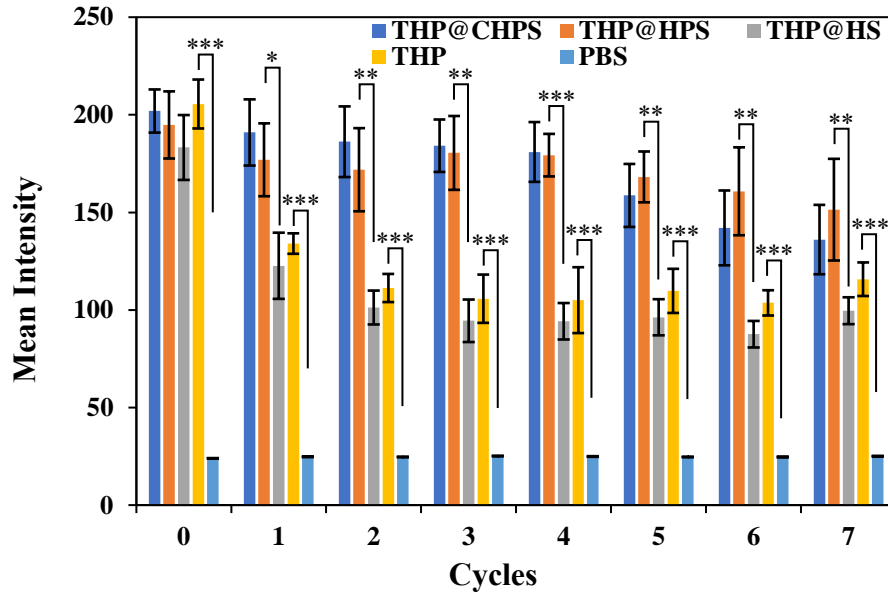

Fig. S7 Quantitative fluorescence intensity of skins as shown in Fig 3E.



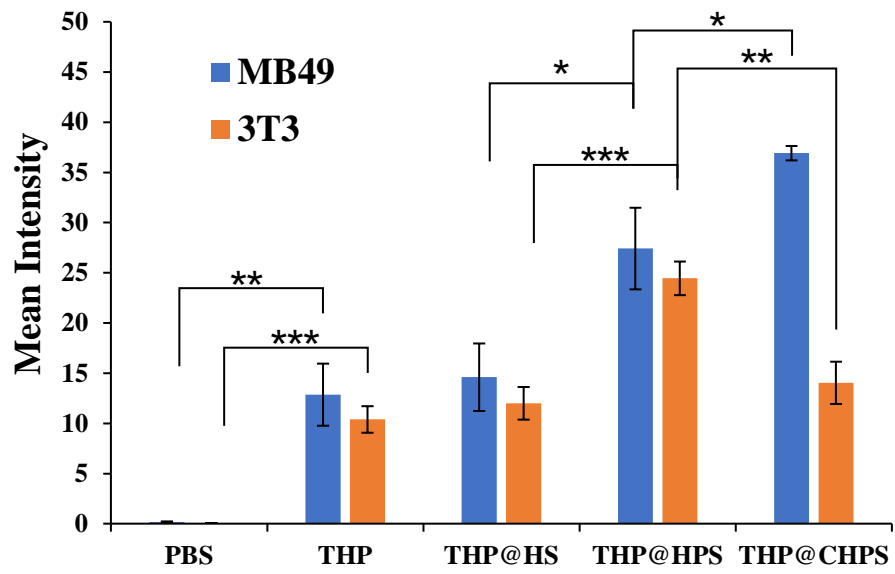

**Figure S8.** Quantitative fluorescence intensity of THP in cells as shown in Fig 4A.

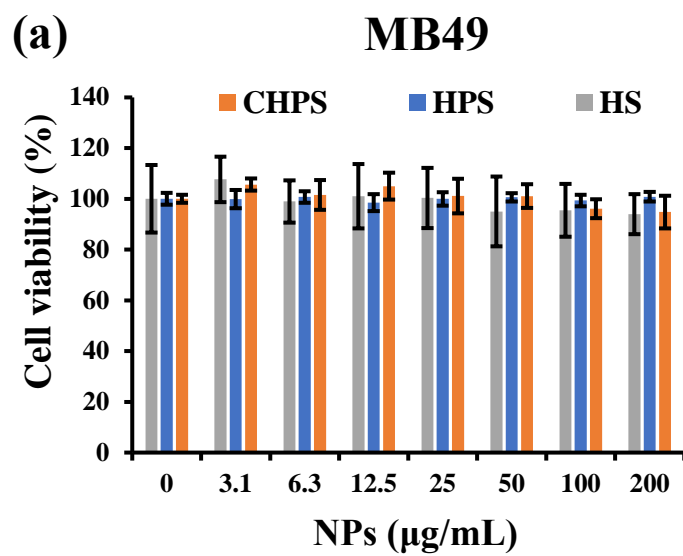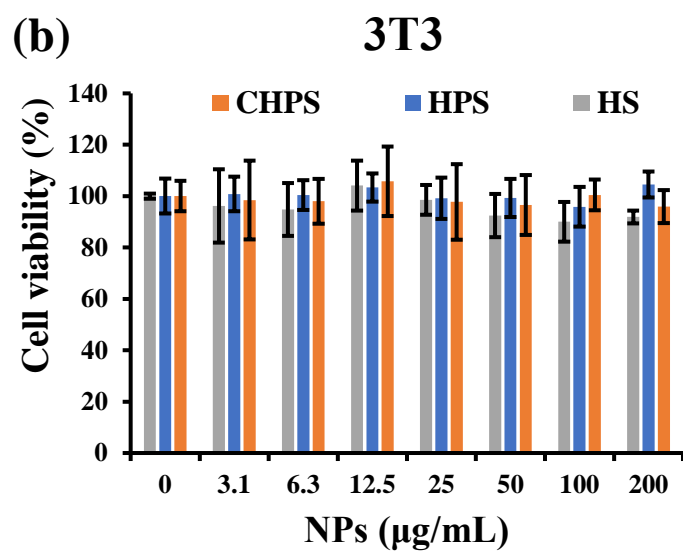

**Fig. S9** Effects of CHPS, HPS and HS NPs on the viability of MB49 (a) and 3T3 (b) cells.

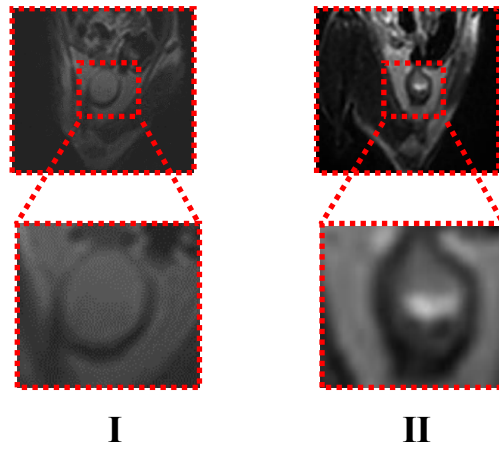

**Fig. S10** MRI imaging before(I) and after(II) the construction of bladder cancer model.

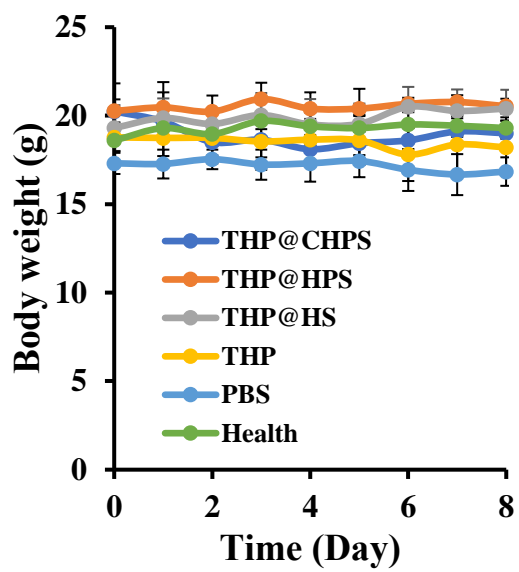

**Fig. S11** Changes in body weight of mice during treatment.

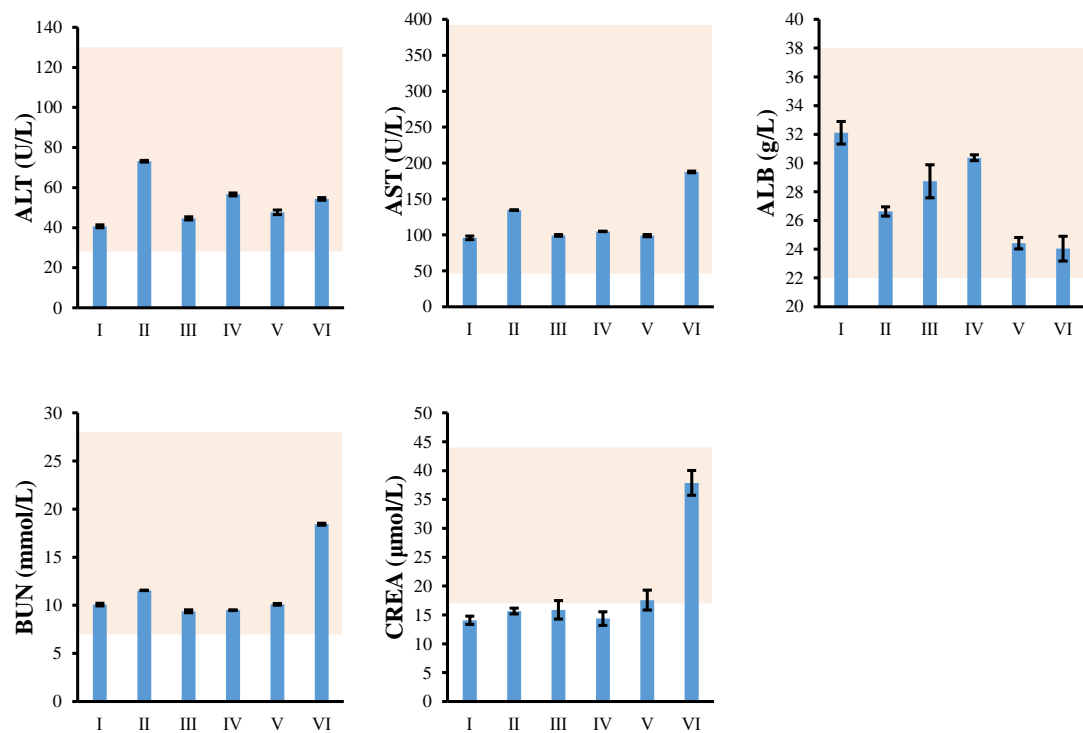

**Fig. S12** Biochemistry parameters of mice treated different conditions and detected at the end of 8

days of treatment. (I: Health; II: THP@CHPS; III: THP@HPS; IV: THP@HS; V: THP; VI: PBS)

The range of parameters of normal mice were indicated with pink rectangle: alanine transaminase

(ALT): (28-130) U/L; aspartate transaminase (AST): (46-392) U/L; albumin (ALB): (22-38) g/L;

blood urea (BUN): (7.0-28) mmol/L; creatinine (CREA): (17-44) μmol/L.

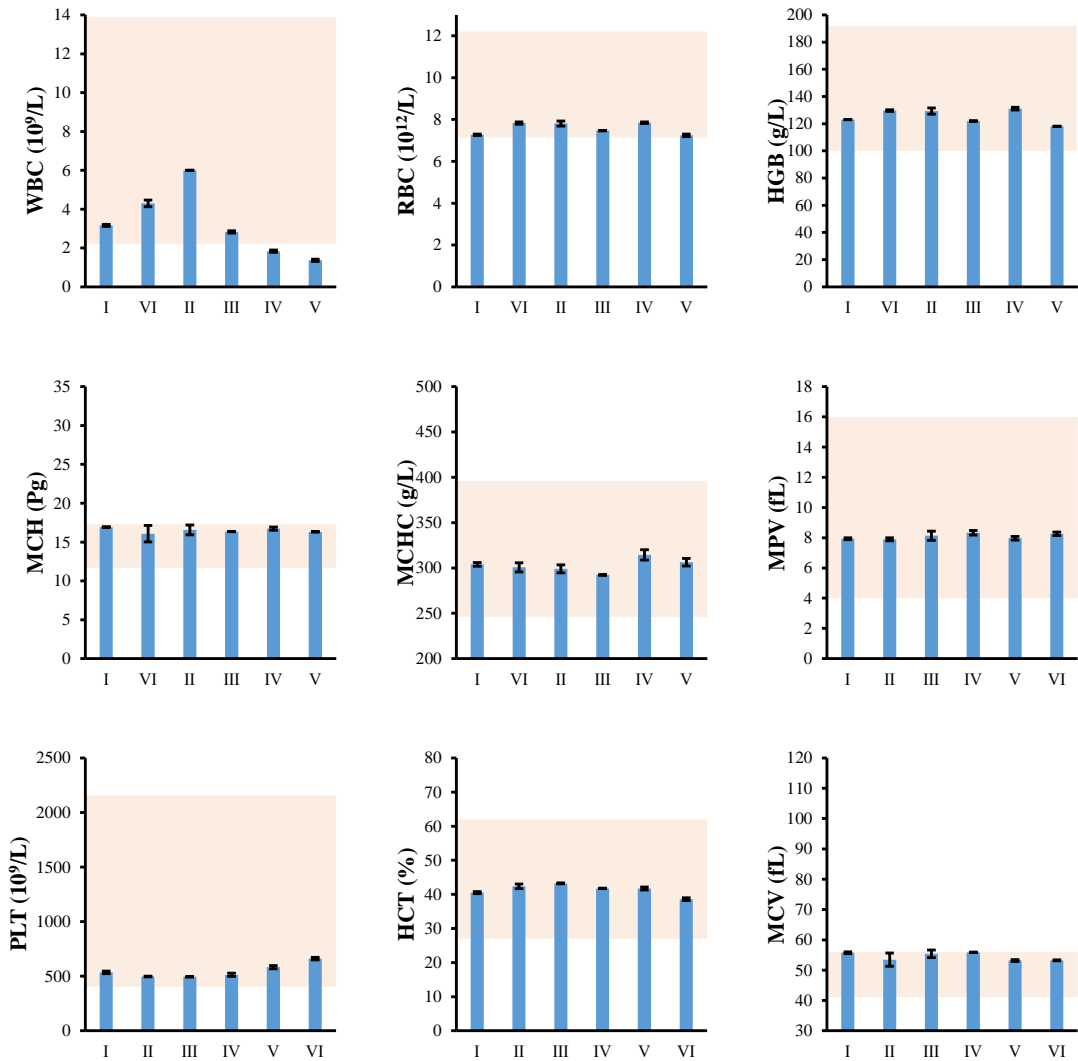

**Fig. S13** Blood routine parameters of mice treated different conditions and detected at the end of 8 days of treatment. (I: Health; II: THP@CHPS; III: THP@HPS; IV: THP@HS; V: THP; VI: PBS) The ranges of parameters of normal mice were indicated with pink rectangle: white blood cell count (WBC):  $(2.2-13.96) \times 10^9/L$ ; red blood cell count (RBC):  $(7.14-12.2) \times 10^{12}/L$ ; hemoglobin(HGB):  $(100-192) g/L$ ; mean cell hemoglobin (MCH):  $(11.7-17.3) Pg$ ; mean cell hemoglobin concentration(MCHC):  $(246-396) g/L$ ; mean platelet volume (MPV):  $(4.0-16.0) fL$ ; platelet count (PLT):  $(400-2159) \times 10^9/L$ ; hematocrit(HCT):  $(27-62) \%$ ; mean cell volume (MCV):  $(41-56) fL$ .

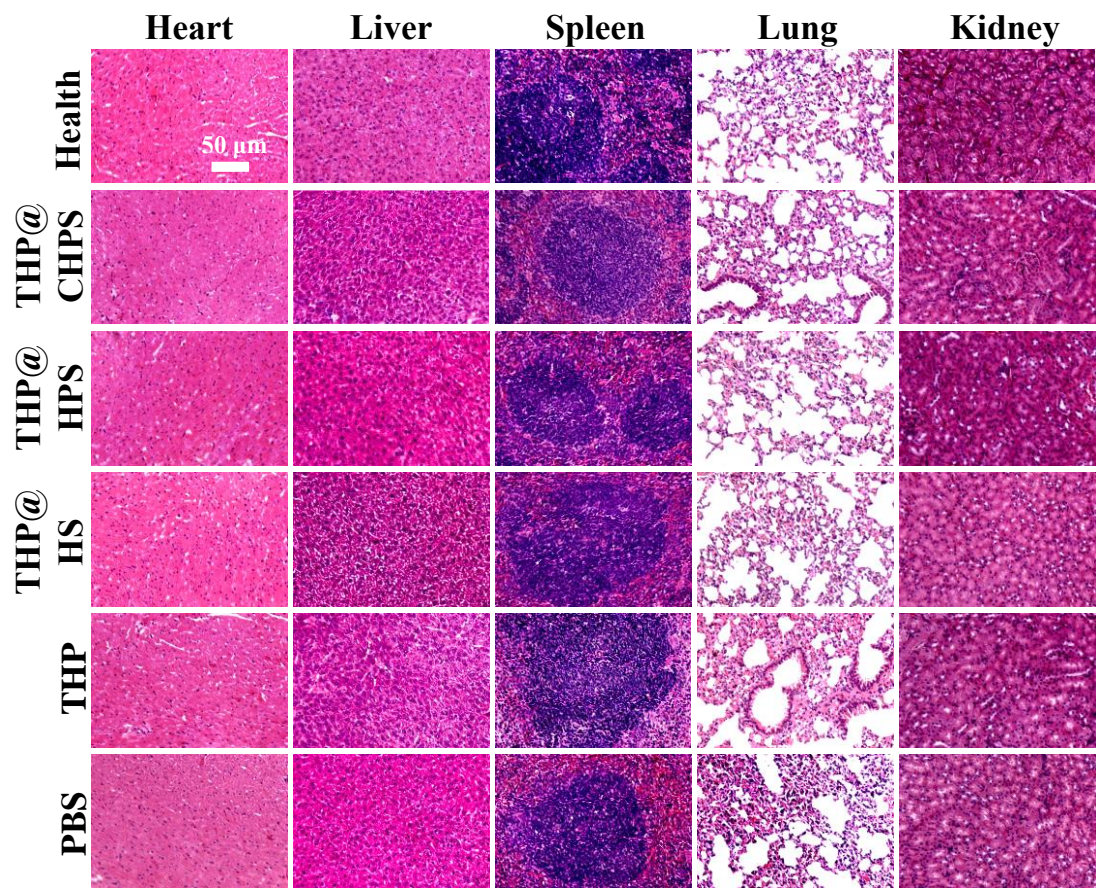

Fig. S14 H&E stained photos of each organ of mice after treatment.
